# Supplementary material
Source: PubMed Central journal article supplement (PMC2862622)
Supplement: NIHMS145180-supplement-4.pdf [file NIHMS145180-supplement-4.pdf]

**Suppl. Table 1:** Epidemiological and clinical data of patients with available liver biopsy

| <b>Gender</b> | <b>Age</b> | <b>HCV genotype</b> | <b>HCV RNA [IU/mL]</b> | <b>ALT [U/mL]</b> | <b>Ishak Inflammatory Score</b> | <b>Ishak Fibrosis Score</b> |
|---------------|------------|---------------------|------------------------|-------------------|---------------------------------|-----------------------------|
| F             | 57         | 1                   | 769,000                | 50                | 6                               | 2                           |
| M             | 55         | 1                   | 2,700,000              | 66                | 3                               | 3                           |
| M             | 63         | 1                   | 3,330,000              | 65                | 6                               | 1                           |
| M             | 53         | 1                   | 214,000                | 156               | 5                               | 1                           |
| M             | 44         | 1                   | 3,960,000              | 170               | 8                               | 2                           |
| M             | 58         | 1                   | 209,000                | 99                | 6                               | 1                           |
| M             | 33         | 3A                  | 10,800                 | 43                | 7                               | 0                           |
| F             | 48         | 1                   | 337,000                | 22                | 4                               | 0                           |
| M             | 57         | 3H, 6E/G            | 890,000                | 123               | 9                               | 3                           |
| F             | 67         | 1                   | 8,080,000              | 173               | 13                              | 3                           |
| M             | 62         | 1                   | 4,560,000              | 37                | 8                               | 1                           |
